# Supplementary material for: Acquisition and loss of virulence-associated factors during genome evolution and speciation in three clades of Bordetella species
Source: PubMed Central journal article supplement (PMC5045587; doi:10.1186/s12864-016-3112-5), 2016-09-30
Supplement: 12864_2016_3112_MOESM1_ESM.pdf [file 12864_2016_3112_MOESM1_ESM.pdf]

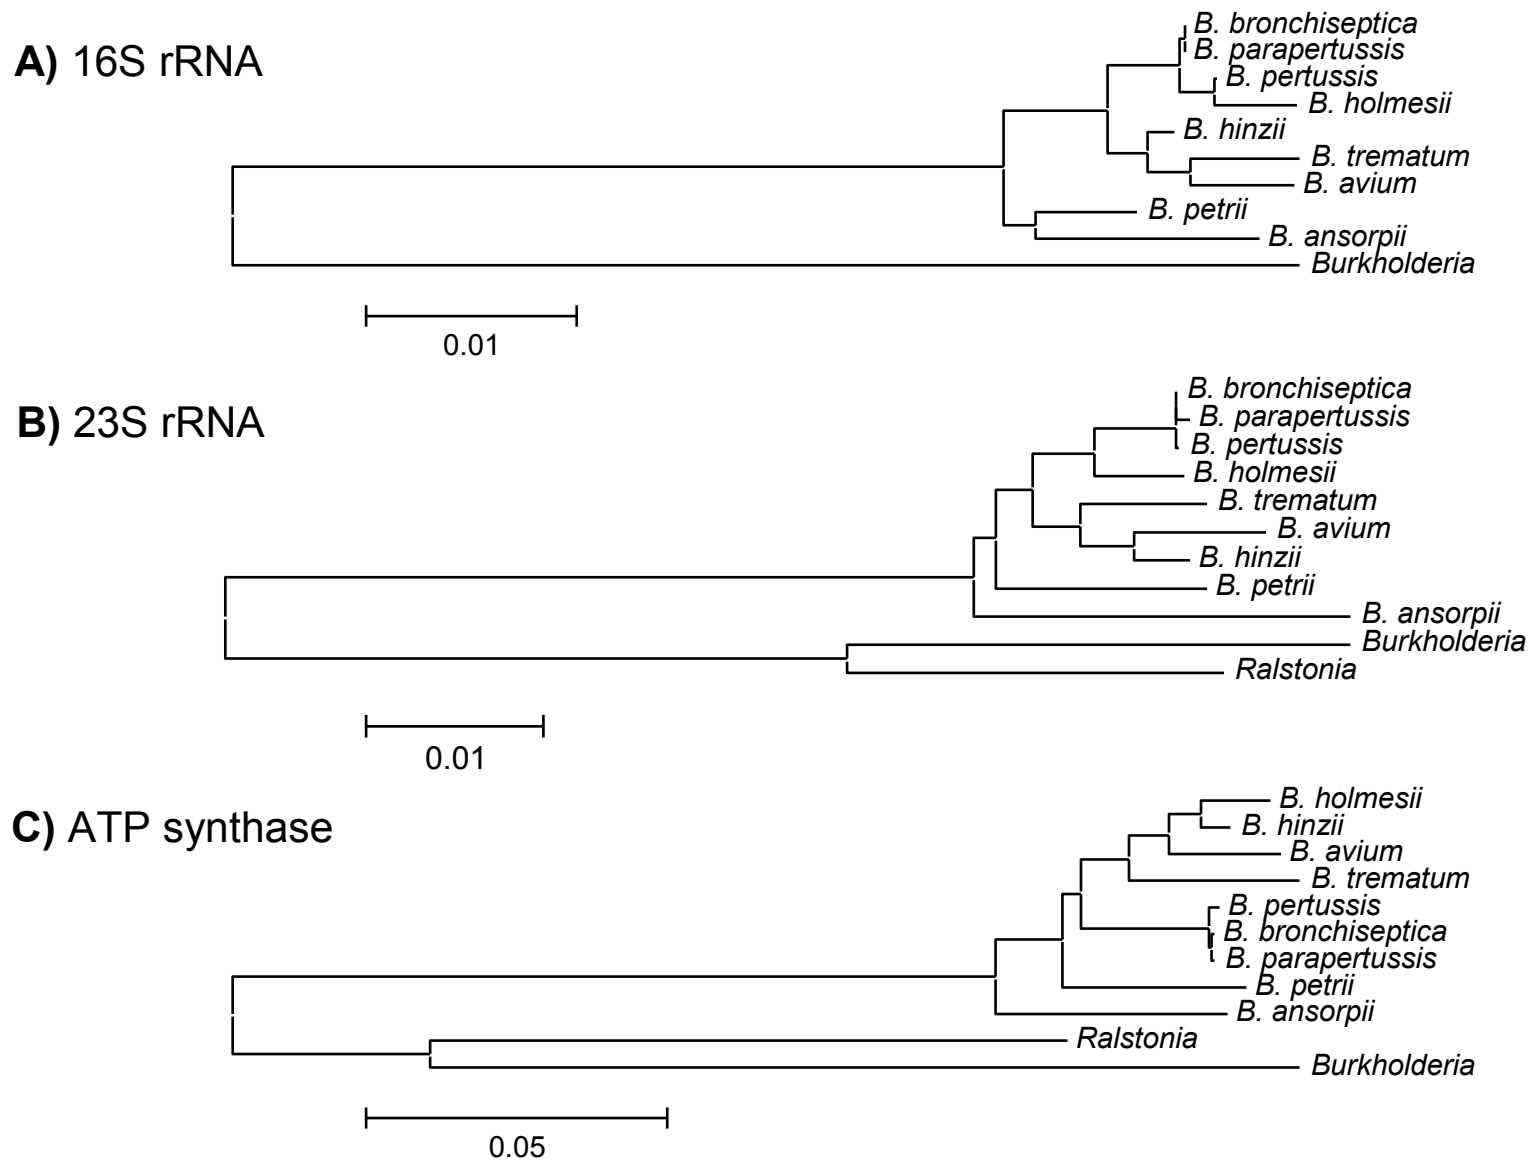

**Figure S1. Phylogenetic structure (Neighbor-joining trees) of A) 16S rRNA gene sequences, B) 23S rRNA gene sequences, and C) 8 concatenated ATP synthase proteins from *Bordetella* and members of the closely related genera *Burkholderia* and *Ralstonia* as an outgroup. In all 3 trees, *B. ansorpii* and *B. petrii* are located closest to the root of the *Bordetella* species.**

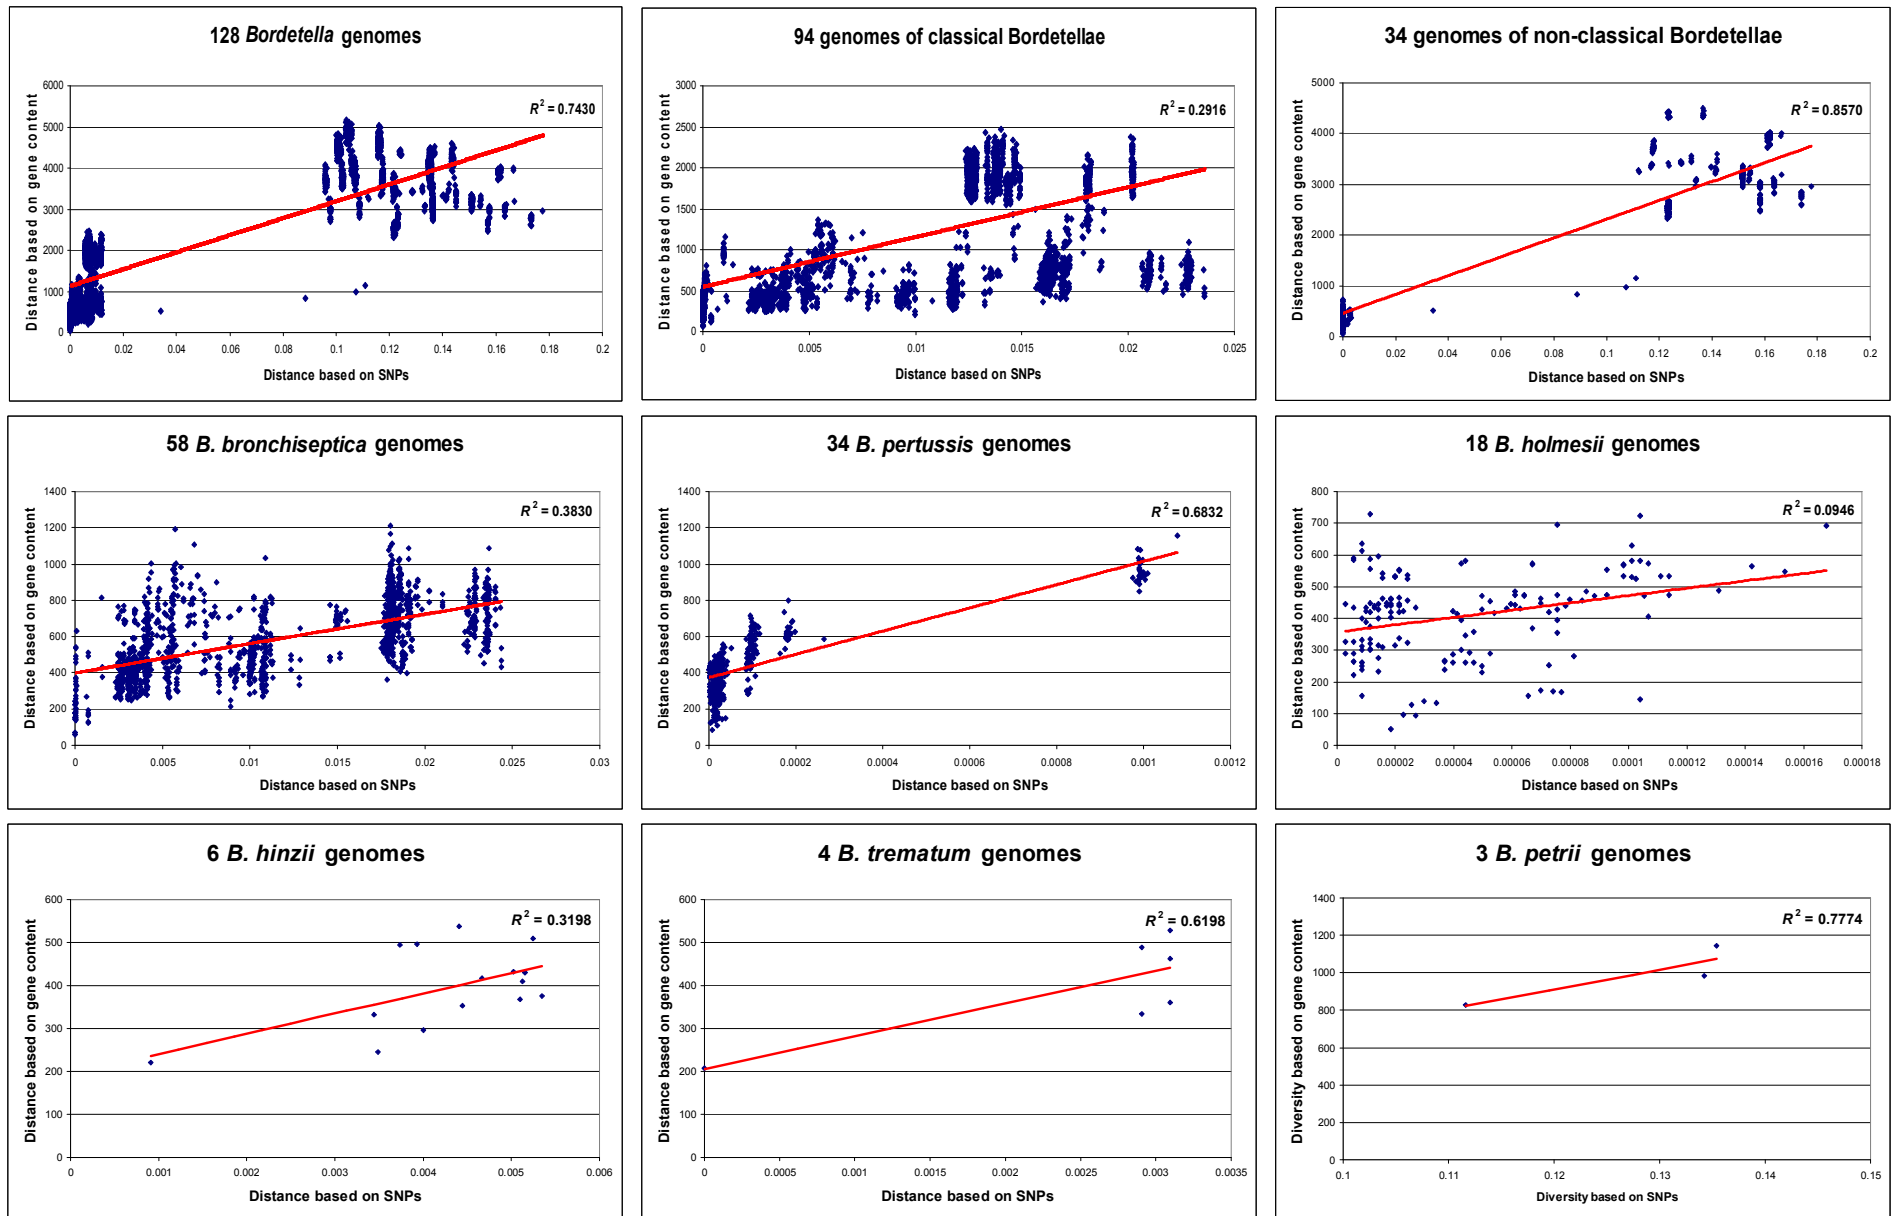

**Figure S2. Correlation between sequence-based and gene content-based matrices of genetic distance between *Bordetella* genomes.**

### A) ATP synthase

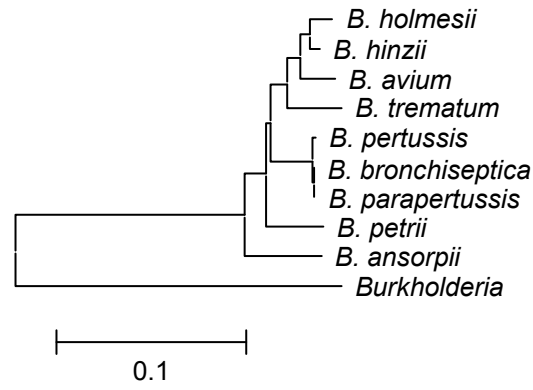

### B) BvgA

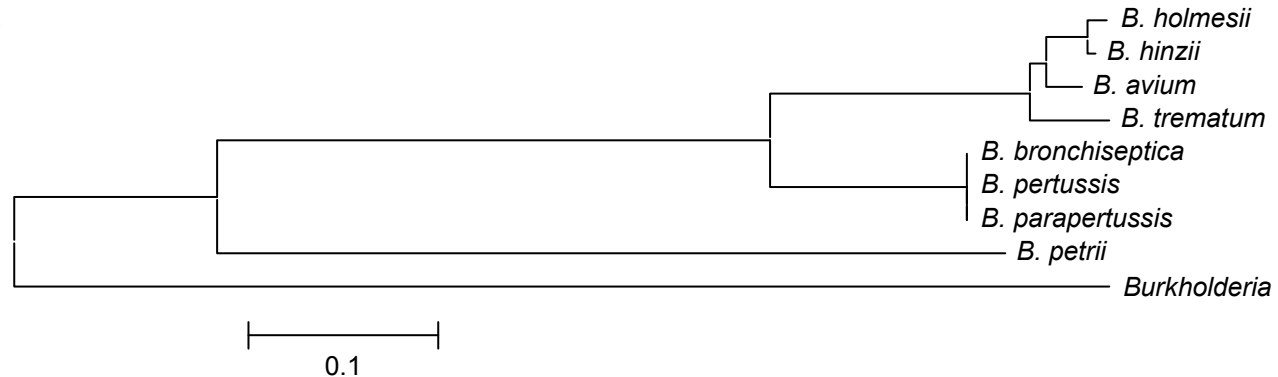

**Figure S3. Phylogenetic structure (Neighbor-joining trees) of A) 8 concatenated ATP synthase proteins and B) BvgA from *Bordetella* species and from *Burkholderia pseudomallei* as an outgroup.** The low average ATP synthase diversity between species clades ( $\pi = 0.0665$ , range = 0.553-0.0783) reflects strong purifying selection due to functional constraints. Accordingly, those genes are part of the *Bordetella* core genome. In contrast, the over 10-fold larger average BvgA diversity between species clades ( $\pi = 0.7756$ , range = 0.2781-1.0262) indicates that large parts of the proteins are less functionally conserved which splits BvgA protein sequences into 3 species clade-specific groups of proteins. The trees are drawn to scale.

## A Species

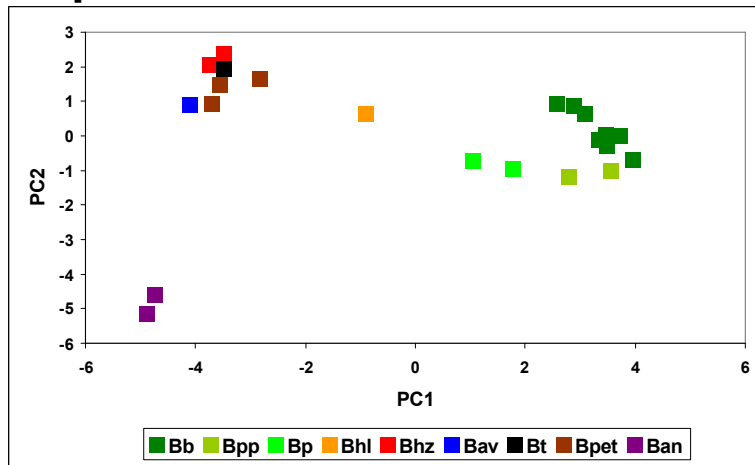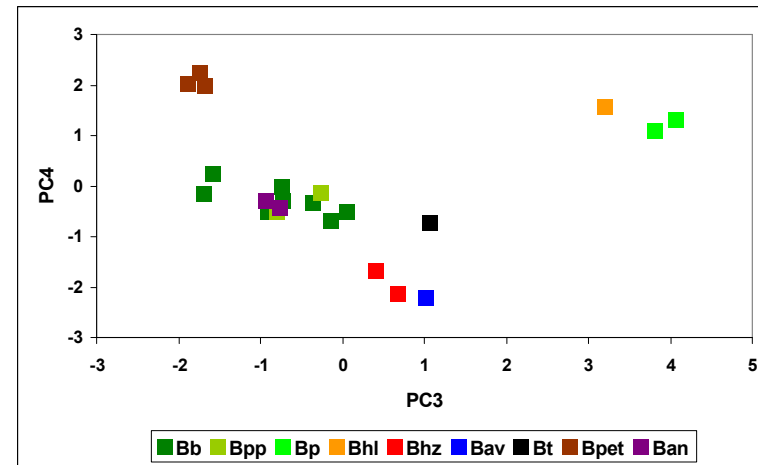

## B Host and disease

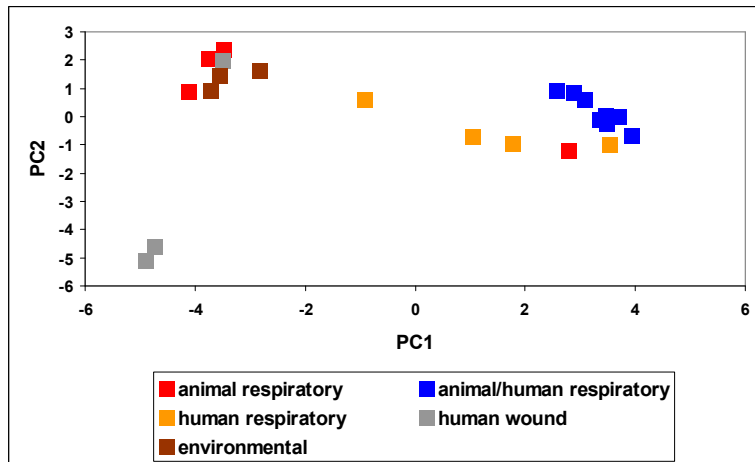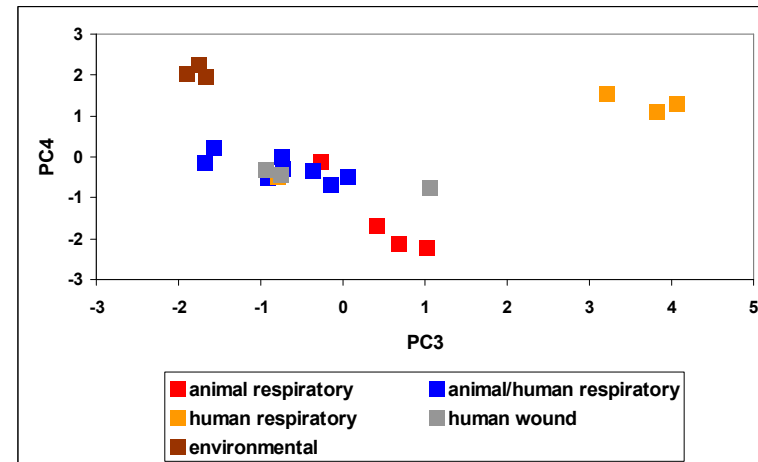

**Supplementary Figure 4. Principal Component Analysis of presence/absence of virulence-associated factors in *Bordetella* genomes by A) *Bordetella* species; B) host and disease.** The genomes from each species were grouped by presence/absence of individual factors, and any unique combination of factors was analyzed as separate data entry resulting in several data points per species. PC1 divides the classical from the non-classical species, PC2 isolates *B. anserpiti*, and PC3 separates the genomes of the human-restricted *B. pertussis* and *B. holmesii* from those of the other species. Bb *B. bronchiseptica*; Bpp *B. parapertussis*; Bp *B. pertussis*; Bhl *B. holmesii*; Bhz *B. hinzii*; Bav *B. avium*; Bt *B. trematum*; Bpet *B. petrii*; Ban *B. anserpiti*

Table S1. Genomes of *Bordetella* isolates.

| Species                  | Strain       | Host       | NCBI accession number | Complex | Reference |
|--------------------------|--------------|------------|-----------------------|---------|-----------|
| <i>B. bronchiseptica</i> | RB50         | Rabbit     | BX470250              | C I     | [1]       |
| <i>B. bronchiseptica</i> | RB630        | Rabbit     | JGYA00000000          | C I     | [2]       |
| <i>B. bronchiseptica</i> | 3E44         | Rabbit     | JGWK00000000          | C I     | [2]       |
| <i>B. bronchiseptica</i> | A1-7         | Rabbit     | JGWO00000000          | C I     | [2]       |
| <i>B. bronchiseptica</i> | B18-5        | Rabbit     | JGWP00000000          | C I     | [2]       |
| <i>B. bronchiseptica</i> | B20-10725633 | Rabbit     | JGWQ00000000          | C I     | [2]       |
| <i>B. bronchiseptica</i> | 980          | Unknown    | JGWM00000000          | C I     | [2]       |
| <i>B. bronchiseptica</i> | CARE970018BB | Pig        | JGWS00000000          | C I     | [2]       |
| <i>B. bronchiseptica</i> | MBORD849     | Pig        | JGXW00000000          | C I     | [2]       |
| <i>B. bronchiseptica</i> | KM22         | Pig        | JNHR00000000          | C I     | [3]       |
| <i>B. bronchiseptica</i> | MBORD595     | Dog        | JGXH00000000          | C I     | [2]       |
| <i>B. bronchiseptica</i> | MBORD785     | Dog        | JGXU00000000          | C I     | [2]       |
| <i>B. bronchiseptica</i> | MBORD839     | Dog        | JGXV00000000          | C I     | [2]       |
| <i>B. bronchiseptica</i> | 253          | Dog        | HE965806              | C I     | [4]       |
| <i>B. bronchiseptica</i> | MBORD635     | Cat        | JG XK00000000         | C I     | [2]       |
| <i>B. bronchiseptica</i> | MBORD782     | Cat        | JGXT00000000          | C I     | [2]       |
| <i>B. bronchiseptica</i> | MBORD665     | Guinea pig | JGXL00000000          | C I     | [2]       |
| <i>B. bronchiseptica</i> | MBORD668     | Guinea pig | JGXM00000000          | C I     | [2]       |
| <i>B. bronchiseptica</i> | MBORD670     | Guinea pig | JGXN00000000          | C I     | [2]       |
| <i>B. bronchiseptica</i> | MBORD678     | Guinea pig | JHBQ00000000          | C I     | [2]       |
| <i>B. bronchiseptica</i> | MBORD762     | Guinea pig | JHBR00000000          | C I     | [2]       |
| <i>B. bronchiseptica</i> | MBORD624     | Horse      | JGXI00000000          | C I     | [2]       |
| <i>B. bronchiseptica</i> | MBORD632     | Horse      | JG XJ00000000         | C I     | [2]       |
| <i>B. bronchiseptica</i> | MBORD731     | Horse      | JGXS00000000          | C I     | [2]       |
| <i>B. bronchiseptica</i> | M435/02/3    | Seal       | JGXE00000000          | C I     | [5]       |
| <i>B. bronchiseptica</i> | M85/00/2     | Seal       | JGXF00000000          | C I     | [5]       |
| <i>B. bronchiseptica</i> | SO10328      | Sea otter  | JGYB00000000          | C I     | [2]       |
| <i>B. bronchiseptica</i> | 1289         | Monkey     | CAKS01000000          | C I     | [2]       |
| <i>B. bronchiseptica</i> | MBORD681     | Koala      | JGXP00000000          | C I     | [2]       |
| <i>B. bronchiseptica</i> | MBORD698     | Koala      | JGXQ00000000          | C I     | [2]       |
| <i>B. bronchiseptica</i> | 00-P-2796    | Human      | JGWH00000000          | C I     | [2]       |
| <i>B. bronchiseptica</i> | D756         | Human      | JGWT00000000          | C I     | [2]       |
| <i>B. bronchiseptica</i> | D989         | Human      | JG WU00000000         | C I     | [2]       |
| <i>B. bronchiseptica</i> | D993         | Human      | JG WV00000000         | C I     | [2]       |
| <i>B. bronchiseptica</i> | E010         | Human      | JG WW00000000         | C I     | [2]       |
| <i>B. bronchiseptica</i> | E012         | Human      | JG WX00000000         | C I     | [2]       |
| <i>B. bronchiseptica</i> | E013         | Human      | JG WY00000000         | C I     | [2]       |
| <i>B. bronchiseptica</i> | MBORD591     | Dog        | JG XG00000000         | C IV    | [2]       |
| <i>B. bronchiseptica</i> | 7E71         | Horse      | JG WL00000000         | C IV    | [2]       |
| <i>B. bronchiseptica</i> | CA90 BB02    | Turkey     | JHBU00000000          | C IV    | [2]       |
| <i>B. bronchiseptica</i> | CA90 BB1334  | Turkey     | JGWR00000000          | C IV    | [2]       |
| <i>B. bronchiseptica</i> | F-1          | Turkey     | JGXA00000000          | C IV    | [2]       |
| <i>B. bronchiseptica</i> | F2           | Turkey     | JGXB00000000          | C IV    | [2]       |

|                          |                |        |               |      |            |
|--------------------------|----------------|--------|---------------|------|------------|
| <i>B. bronchiseptica</i> | MBORD707       | Turkey | JGXR00000000  | C IV | [2]        |
| <i>B. bronchiseptica</i> | MBORD901       | Turkey | JGXX00000000  | C IV | [2]        |
| <i>B. bronchiseptica</i> | OSU054         | Turkey | JHBZ00000000  | C IV | [2]        |
| <i>B. bronchiseptica</i> | OSU095         | Turkey | JGXY00000000  | C IV | [2]        |
| <i>B. bronchiseptica</i> | OSU553         | Turkey | JGXZ00000000  | C IV | [2]        |
| <i>B. bronchiseptica</i> | 00-P-2730      | Human  | JGWG00000000  | C IV | [2]        |
| <i>B. bronchiseptica</i> | E014           | Human  | JGWZ00000000  | C IV | [2]        |
| <i>B. bronchiseptica</i> | F4563          | Human  | JGXC00000000  | C IV | [2]        |
| <i>B. bronchiseptica</i> | GA96-01        | Human  | JGXD00000000  | C IV | [2]        |
| <i>B. bronchiseptica</i> | MBORD675       | Human  | JG XO00000000 | C IV | [2]        |
| <i>B. bronchiseptica</i> | MO211          | Human  | JHOJ00000000  | C IV | [2]        |
| <i>B. bronchiseptica</i> | MO275          | Human  | JHBS00000000  | C IV | [2]        |
| <i>B. bronchiseptica</i> | SBL-F6116      | Human  | JHBT00000000  | C IV | [2]        |
| <i>B. bronchiseptica</i> | MO149          | Human  | HE965806      | C IV | [4]        |
| <i>B. bronchiseptica</i> | Bbr77          | Human  | CAKU01000000  | C IV | [4]        |
| <i>B. pertussis</i>      | Tohama I       | Human  | BX470248      |      | [1]        |
| <i>B. pertussis</i>      | CS             | Human  | CP002695      |      | [6]        |
| <i>B. pertussis</i>      | STO1-CHLA-0011 | Human  | AXSP00000000  |      | [7]        |
| <i>B. pertussis</i>      | H897           | Human  | AXSO00000000  |      | [7]        |
| <i>B. pertussis</i>      | H918           | Human  | AXSN00000000  |      | [7]        |
| <i>B. pertussis</i>      | H921           | Human  | AXSM00000000  |      | [7]        |
| <i>B. pertussis</i>      | H939           | Human  | AXSL00000000  |      | [7]        |
| <i>B. pertussis</i>      | H973           | Human  | AXSK00000000  |      | [7]        |
| <i>B. pertussis</i>      | STO1-SEAT-0004 | Human  | AXSJ00000000  |      | [7]        |
| <i>B. pertussis</i>      | I002           | Human  | AXSI00000000  |      | [7]        |
| <i>B. pertussis</i>      | I036           | Human  | AXSH00000000  |      | [7]        |
| <i>B. pertussis</i>      | I176           | Human  | AXSG00000000  |      | [7]        |
| <i>B. pertussis</i>      | STO1-CHOC-0008 | Human  | AXRV00000000  |      | [7]        |
| <i>B. pertussis</i>      | STO1-CHOM-0012 | Human  | AXRU00000000  |      | [7]        |
| <i>B. pertussis</i>      | STO1-CNMC-0004 | Human  | AXSV00000000  |      | [7]        |
| <i>B. pertussis</i>      | STO1-CHOC-0016 | Human  | AXSA00000000  |      | [7]        |
| <i>B. pertussis</i>      | STO1-CHOC-0017 | Human  | AXRZ00000000  |      | [7]        |
| <i>B. pertussis</i>      | STO1-CHOC-0018 | Human  | AXRY00000000  |      | [7]        |
| <i>B. pertussis</i>      | STO1-CHOC-0019 | Human  | AXRX00000000  |      | [7]        |
| <i>B. pertussis</i>      | STO1-CHOC-0021 | Human  | AXRW00000000  |      | [7]        |
| <i>B. pertussis</i>      | CHLA-15        | Human  | AXSD00000000  |      | [7]        |
| <i>B. pertussis</i>      | CHLA-13        | Human  | AXSE00000000  |      | [7]        |
| <i>B. pertussis</i>      | CHLA-20        | Human  | AXSC00000000  |      | [7]        |
| <i>B. pertussis</i>      | CHLA-26        | Human  | AXSB00000000  |      | [7]        |
| <i>B. pertussis</i>      | STO1-CHLA-0006 | Human  | AXSF00000000  |      | [7]        |
| <i>B. pertussis</i>      | CHLA-11        | Human  | AYXH01000000  |      | this study |
| <i>B. pertussis</i>      | B200           | Human  | JGWE01000000  |      | this study |
| <i>B. pertussis</i>      | 2250905        | Human  | AXSU00000000  |      | [7]        |
| <i>B. pertussis</i>      | 2356847        | Human  | AXST00000000  |      | [7]        |
| <i>B. pertussis</i>      | 2371640        | Human  | AXSS00000000  |      | [7]        |
| <i>B. pertussis</i>      | STO1-SEAT-0006 | Human  | AXSR00000000  |      | [7]        |
| <i>B. pertussis</i>      | STO1-SEAT-0007 | Human  | AXSQ00000000  |      | [7]        |

|                         |               |               |               |  |                        |
|-------------------------|---------------|---------------|---------------|--|------------------------|
| <i>B. pertussis</i>     | H934          | Human         | JGWF00000000  |  | this study             |
| <i>B. pertussis</i>     | 18323         | Human         | HE965805      |  | [4]                    |
| <i>B. parapertussis</i> | 12822         | Human         | BX470249      |  | [1]                    |
| <i>B. parapertussis</i> | Bpp5          | Sheep         | HE965803      |  | [4]                    |
| <i>B. holmesii</i>      | H620          | Human         | JJNW01000000  |  | this study             |
| <i>B. holmesii</i>      | H572          | Human         | JFZY00000000  |  | [8]                    |
| <i>B. holmesii</i>      | H585          | Human         | JFZZ00000000  |  | [8]                    |
| <i>B. holmesii</i>      | H629          | Human         | JGVZ00000000  |  | [8]                    |
| <i>B. holmesii</i>      | H635          | Human         | JGAA00000000  |  | [8]                    |
| <i>B. holmesii</i>      | H643          | Human         | JGWD00000000  |  | [8]                    |
| <i>B. holmesii</i>      | H719          | Human         | JGWA00000000  |  | [8]                    |
| <i>B. holmesii</i>      | H785          | Human         | JGWB00000000  |  | [8]                    |
| <i>B. holmesii</i>      | H809          | Human         | JMGZ00000000  |  | [8]                    |
| <i>B. holmesii</i>      | 04P3421       | Human         | JGWC00000000  |  | [8]                    |
| <i>B. holmesii</i>      | 1058          | Human         | JDTF01000000  |  | Tettelin <sup>*1</sup> |
| <i>B. holmesii</i>      | 30539         | Human         | JDFP01000000  |  | Tettelin <sup>*1</sup> |
| <i>B. holmesii</i>      | 35009         | Human         | JDSK01000000  |  | Tettelin <sup>*1</sup> |
| <i>B. holmesii</i>      | 41130         | Human         | JDSC01000000  |  | Tettelin <sup>*1</sup> |
| <i>B. holmesii</i>      | 44057         | Human         | CP007495      |  | Tettelin <sup>*1</sup> |
| <i>B. holmesii</i>      | 70147         | Human         | JDSJ01000000  |  | Tettelin <sup>*1</sup> |
| <i>B. holmesii</i>      | F627          | Human         | AOEW01000000  |  | [9]                    |
| <i>B. holmesii</i>      | H558          | Human         | AOFR01000000  |  | [9]                    |
| <i>B. hinzii</i>        | OH87 BAL007II | Turkey        | JHEM00000000  |  | [10]                   |
| <i>B. hinzii</i>        | CA90 BAL1384  | Turkey        | JHEO00000000  |  | [10]                   |
| <i>B. hinzii</i>        | 4161          | Turkey        | JHER00000000  |  | [10]                   |
| <i>B. hinzii</i>        | 1277          | Human         | JHES00000000  |  | [10]                   |
| <i>B. hinzii</i>        | L60           | Human         | JHEN00000000  |  | [10]                   |
| <i>B. hinzii</i>        | 5132          | Rabbit        | JHEQ00000000  |  | [10]                   |
| <i>B. trematum</i>      | CCUG_13902    | Human         | AWNLO1000000  |  | [11]                   |
| <i>B. trematum</i>      | H044680328    | Human         | LT546645      |  | this study             |
| <i>B. trematum</i>      | H064000408    | Human         | FKBS01000000  |  | this study             |
| <i>B. trematum</i>      | NCTC12995     | Human         | FKBR01000000  |  | this study             |
| <i>B. avium</i>         | 197N          | Turkey        | AM167904      |  | [12]                   |
| <i>B. petrii</i>        | DSM_12804     | Environmental | AM902716      |  | [13]                   |
| <i>B. petrii</i>        | J49           | Environmental | JA EJ01000000 |  | Gladden <sup>*2</sup>  |
| <i>B. petrii</i>        | J51           | Environmental | JA EP01000000 |  | Gladden <sup>*2</sup>  |
| <i>B. ansoipii</i>      | NCTC13364     | Human         | FKBT01000000  |  | this study             |
| <i>B. ansoipii</i>      | H050680373    | Human         | FKIF01000000  |  | this study             |

\*1 - Tettelin H, Hooven TA, Hine E, Su Q, Huard RC, Della-Latta P, Daugherty SC, Agrawal S, Sengamalay N, Tallon LJ, Sadzewicz L, Whittier S, Fraser CM and Ratner AJ. Whole genome sequencing of *Bordetella holmesii*, an emerging opportunistic infection of humans. unpublished.

\*2 - Gladden J, Huntemann M, Han J, Chen A, Kyrpides N, Mavromatis K, Markowitz V, Palaniappan K, Ivanova N, Schaumberg A, Pati A, Liolios K, Nordberg HP, Cantor MN, Hua SX and Woyke T. Genome sequencing of lignin-degrading bacterial isolates. unpublished.



**Supplementary Table 2. Within and between species genetic distance based on genome-wide sequence diversity.**

| <i>Bordetella</i> species | Number of Genomes | Within-species genetic distance | Pair-wise between species genetic distance |                          |                     |                    |                  |                 |                    |                    |
|---------------------------|-------------------|---------------------------------|--------------------------------------------|--------------------------|---------------------|--------------------|------------------|-----------------|--------------------|--------------------|
|                           |                   |                                 | <i>B. bronchi-septica</i>                  | <i>B. para-pertussis</i> | <i>B. pertussis</i> | <i>B. trematum</i> | <i>B. hinzii</i> | <i>B. avium</i> | <i>B. holmesii</i> | <i>B. ansorpii</i> |
| <i>B. bronchiseptica</i>  | 58                | 0.00289                         |                                            |                          |                     |                    |                  |                 |                    |                    |
| <i>B. parapertussis</i>   | 2                 | 0.00253                         | 0.00317                                    |                          |                     |                    |                  |                 |                    |                    |
| <i>B. pertussis</i>       | 34                | 0.00004                         | 0.00397                                    | 0.00431                  |                     |                    |                  |                 |                    |                    |
| <i>B. trematum</i>        | 4                 | 0.00122                         | 0.08491                                    | 0.08576                  | 0.08595             |                    |                  |                 |                    |                    |
| <i>B. hinzii</i>          | 6                 | 0.00121                         | 0.07438                                    | 0.07521                  | 0.07552             | 0.08488            |                  |                 |                    |                    |
| <i>B. avium</i>           | 1                 | NA                              | 0.10385                                    | 0.10443                  | 0.10487             | 0.11107            | 0.09226          |                 |                    |                    |
| <i>B. holmesii</i>        | 18                | 0.00002                         | 0.10186                                    | 0.10250                  | 0.10298             | 0.11089            | 0.08349          | 0.11043         |                    |                    |
| <i>B. ansorpii</i>        | 2                 | 0.02119                         | 0.07958                                    | 0.08025                  | 0.08087             | 0.10680            | 0.09558          | 0.12722         | 0.12557            |                    |
| <i>B. petrii</i>          | 3                 | 0.07534                         | 0.08195                                    | 0.08267                  | 0.08317             | 0.11125            | 0.09992          | 0.12995         | 0.12823            | 0.09764            |

**Supplementary Table 3. Within and between species genetic distance based on presence and absence of genes.**

| <i>Bordetella</i> species | Number of Genomes | Within-species genetic distance | Pair-wise between species genetic distance |                          |                     |                    |                  |                 |                    |                    |
|---------------------------|-------------------|---------------------------------|--------------------------------------------|--------------------------|---------------------|--------------------|------------------|-----------------|--------------------|--------------------|
|                           |                   |                                 | <i>B. bronchi-septica</i>                  | <i>B. para-pertussis</i> | <i>B. pertussis</i> | <i>B. trematum</i> | <i>B. hinzii</i> | <i>B. avium</i> | <i>B. holmesii</i> | <i>B. ansorpii</i> |
| <i>B. bronchiseptica</i>  | 58                | 0.03721                         |                                            |                          |                     |                    |                  |                 |                    |                    |
| <i>B. parapertussis</i>   | 2                 | 0.07783                         | 0.0745                                     |                          |                     |                    |                  |                 |                    |                    |
| <i>B. pertussis</i>       | 34                | 0.02723                         | 0.1311                                     | 0.1179                   |                     |                    |                  |                 |                    |                    |
| <i>B. trematum</i>        | 4                 | 0.02465                         | 0.3714                                     | 0.3160                   | 0.2849              |                    |                  |                 |                    |                    |
| <i>B. hinzii</i>          | 6                 | 0.02448                         | 0.3575                                     | 0.3093                   | 0.2800              | 0.2805             |                  |                 |                    |                    |
| <i>B. avium</i>           | 1                 | NA                              | 0.3305                                     | 0.2752                   | 0.2441              | 0.2245             | 0.2197           |                 |                    |                    |
| <i>B. holmesii</i>        | 18                | 0.02536                         | 0.3067                                     | 0.2551                   | 0.2231              | 0.2315             | 0.1775           | 0.1849          |                    |                    |
| <i>B. ansorpii</i>        | 2                 | 0.03161                         | 0.4008                                     | 0.3435                   | 0.3142              | 0.3464             | 0.3446           | 0.3039          | 0.2982             |                    |
| <i>B. petrii</i>          | 3                 | 0.06299                         | 0.2728                                     | 0.2322                   | 0.2076              | 0.2514             | 0.2457           | 0.2219          | 0.2066             | 0.2436             |

**Supplementary Table 4. Ratio of gene content based vs sequence based within and between species genetic distances.**

| <i>Bordetella</i> species | Number of Genomes | Ratio of within-species genetic distances | Ratio of Pair-wise between species genetic distance |                          |                     |                    |                  |                 |                    |                    |  |
|---------------------------|-------------------|-------------------------------------------|-----------------------------------------------------|--------------------------|---------------------|--------------------|------------------|-----------------|--------------------|--------------------|--|
|                           |                   |                                           | <i>B. bronchi-septica</i>                           | <i>B. para-pertussis</i> | <i>B. pertussis</i> | <i>B. trematum</i> | <i>B. hinzii</i> | <i>B. avium</i> | <i>B. holmesii</i> | <i>B. ansorpii</i> |  |
| <i>B. bronchiseptica</i>  | 58                | 12.9                                      |                                                     |                          |                     |                    |                  |                 |                    |                    |  |
| <i>B. parapertussis</i>   | 2                 | 30.8                                      | 23.5                                                |                          |                     |                    |                  |                 |                    |                    |  |
| <i>B. pertussis</i>       | 34                | 680.8                                     | 33.0                                                | 27.4                     |                     |                    |                  |                 |                    |                    |  |
| <i>B. trematum</i>        | 4                 | 20.2                                      | 4.4                                                 | 3.7                      | 3.3                 |                    |                  |                 |                    |                    |  |
| <i>B. hinzii</i>          | 6                 | 20.2                                      | 4.8                                                 | 4.1                      | 3.7                 | 3.3                |                  |                 |                    |                    |  |
| <i>B. avium</i>           | 1                 | NA                                        | 3.2                                                 | 2.6                      | 2.3                 | 2.0                | 2.4              |                 |                    |                    |  |
| <i>B. holmesii</i>        | 18                | 1268.0                                    | 3.0                                                 | 2.5                      | 2.2                 | 2.1                | 2.1              | 1.7             |                    |                    |  |
| <i>B. ansorpii</i>        | 2                 | 1.5                                       | 5.0                                                 | 4.3                      | 3.9                 | 3.2                | 3.6              | 2.4             | 2.4                |                    |  |
| <i>B. petrii</i>          | 3                 | 0.8                                       | 3.3                                                 | 2.8                      | 2.5                 | 2.3                | 2.5              | 1.7             | 1.6                | 2.5                |  |

**Table S5. Most conserved core genome**

| cluster_ | protein name                                          |
|----------|-------------------------------------------------------|
| 1        | methyltransferase GidB                                |
| 2        | CobQ/CobB/MinD/ParA nucleotide binding domain protein |
| 4        | chromosome Partitioning Protein                       |
| 7        | secretion protein SecE PA4276                         |
| 8        | transcription termination/antitermination factor NusG |
| 9        | ribosomal protein L11                                 |
| 10       | ribosomal protein L1                                  |
| 11       | 50s ribosomal protein L10.                            |
| 12       | ribosomal protein L7/L12                              |
| 13       | DNA-directed RNA polymerase, beta subunit             |
| 14       | dna-directed rna polymerase beta' chain               |
| 20       | Two-component response regulator                      |
| 24       | ribosomal protein S7                                  |
| 28       | ribosomal protein L3                                  |
| 29       | ribosomal protein L4/L1 family                        |
| 30       | ribosomal protein L23                                 |
| 31       | ribosomal protein L2                                  |
| 32       | ribosomal protein S19                                 |
| 34       | ribosomal protein S3                                  |
| 35       | ribosomal protein L16                                 |
| 36       | ribosomal protein L29                                 |
| 37       | 30S ribosomal protein S17 NMB0151                     |
| 40       | ribosomal protein L14                                 |
| 41       | ribosomal protein L24                                 |
| 42       | 50S ribosomal protein L5 NMB0154                      |
| 43       | ribosomal protein S14p/S29e                           |
| 44       | ribosomal protein S8                                  |
| 45       | 50S ribosomal protein L6 NMB0157                      |
| 46       | ribosomal protein L18                                 |
| 47       | ribosomal protein S5                                  |
| 48       | ribosomal protein L30                                 |
| 49       | ribosomal protein L15                                 |
| 50       | preprotein translocase SecY chain                     |
| 53       | ribosomal protein S11                                 |
| 54       | ribosomal protein S4                                  |
| 55       | DNA-directed RNA polymerase, alpha subunit            |
| 57       | histidine triad protein                               |
| 59       | thiol:disulfide interchange protein dsbd precursor    |
| 62       | ribosome biogenesis GTP-binding protein YsxC          |
| 63       | putative cytochrome C4                                |
| 64       | ResB-like protein                                     |
| 65       | cytochrome c biogenesis protein                       |
| 66       | diaminopimelate decarboxylase                         |
| 67       | iron donor protein CyaY                               |
| 69       | shikimate kinase I                                    |
| 70       | 3-dehydroquinate synthase                             |
| 71       | phosphohydrolase-associated domain protein            |
| 93       | malate synthase G                                     |
| 99       | GAF domain protein                                    |
| 112      | Protein of unknown function (DUF502) family           |

114 Endonuclease/Exonuclease/phosphatase family superfamily  
155 type III pantothenate kinase  
156 biotin-(acetyl-CoA-carboxylase) ligase  
162 penicillin-binding protein 6 precursor  
163 d-alanine aminotransferase  
164 conserved hypothetical protein  
165 lipoyl(octanoyl) transferase  
166 lipoic acid synthetase  
171 copper binding periplasmic protein CusF  
172 ATP-dependent protease HslVU, ATPase subunit  
174 DnaK suppressor protein NMB0056  
175 CobW/P47K family protein  
184 PF04340 family protein  
185 diaminopimelate epimerase  
186 lipid A biosynthesis (KDO)2-(lauroyl)-lipid IVA acyltransferase  
190 adenosylhomocysteinase  
191 Membrane protein of unknown function superfamily  
192 methylenetetrahydrofolate reductase (NAD(P)H)  
197 5-formyltetrahydrofolate cyclo-ligase  
198 putative transglycosylase  
202 uracil-DNA glycosylase  
230 probable aminotransferase  
233 PH domain protein  
234 hydroxymethylglutaryl-CoA lyase  
241 PUTATIVE HYDROLASE PHOSPHATASE PROTEIN  
254 16S rRNA (cytosine(967)-C(5))-methyltransferase  
256 GHKL domain protein  
285 preprotein translocase, SecB subunit  
286 Glutaredoxin  
287 Rhodanese-like domain protein  
288 phosphoglycerate mutase 1 family  
289 peptidase, M23 family  
290 carboxy-terminal processing protease precursor  
291 thiF protein NMB2062  
294 thiamine biosynthesis protein thic.  
295 putative lipoprotein  
301 glutamate 5-kinase  
305 octaprenyl-diphosphate synthase  
374 peptide chain release factor 1  
375 protein-(glutamine-N5) methyltransferase, release factor-specific  
376 glutaredoxin-related protein  
377 3-octaprenyl-4-hydroxybenzoate carboxy-lyase  
487 N-acetylmuramoyl-L-alanine amidase  
490 signal recognition particle protein  
858 asparagine synthase (glutamine-hydrolyzing)  
859 glycosyl transferase, group 1 family protein domain protein  
860 glycosyltransferase, group 1 family protein  
865 FAD linked oxidase, C-terminal domain protein  
870 fumarylacetoacetase  
876 tetratricopeptide repeat protein  
877 outer membrane lipoprotein LolB  
880 ribose-phosphate diphosphokinase

881 ribosomal protein L25, Ctc-form  
882 aminoacyl-tRNA hydrolase  
883 CAAX protease self-immunity  
884 GTP-binding protein YchF  
916 asmA protein VC1039 , putative  
917 molybdenum cofactor sulfurase protein, putative  
918 benzoate transporter  
920 pantetheine-phosphate adenylyltransferase  
921 methyltransferase, putative  
930 3,4-dihydroxy-2-butanone-4-phosphate synthase  
931 6,7-dimethyl-8-ribityllumazine synthase  
932 transcription antitermination factor NusB  
934 phosphatidylglycerophosphatase A  
935 protein ygad.  
936 orotidine 5'-phosphate decarboxylase  
937 pyridine nucleotide-disulfide oxidoreductase  
938 prokaryotic diacylglycerol kinase  
941 60 kda chaperonin  
942 chaperonin, 10 kDa  
1312 molybdenum cofactor biosynthesis protein A  
1313 molybdopterin biosynthesis protein MoeA  
1315 molybdopterin converting factor, subunit 2  
1316 molybdopterin converting factor  
1317 molybdenum cofactor biosynthesis protein C  
1321 AhpC/TSA family protein  
1341 magnesium and cobalt efflux protein corc.  
1343 PhoH family protein  
1349 preprotein translocase, YajC subunit, putative  
1351 S-adenosylmethionine:tRNA ribosyltransferase-isomerase  
1353 uracil phosphoribosyltransferase  
1356 hypothetical protein  
1358 hypothetical protein  
1360 3-octaprenyl-4-hydroxybenzoate carboxy-lyase  
1640 HYPOTHETICAL TRANSMEMBRANE PROTEIN  
1643 4-hydroxy-tetrahydrodipicolinate synthase  
1644 putative lipoprotein  
1692 flavin reductase  
1694 imelysin  
1695 cytochrome C  
1697 PF07433 family protein  
1698 small conductance mechanosensitive ion channel  
1700 putative exported protein  
1702 RNA methyltransferase, TrmH family, group 1  
1703 inositol monophosphatase family protein  
1704 integral membrane protein / hemolysin  
1705 undecaprenol kinase, putative  
1707 peptidyl-prolyl cis-trans isomerase B  
1708 tetratricopeptide repeat protein  
1710 DNA-3-methyladenine glycosylase  
1711 acetyl-CoA carboxylase, carboxyl transferase, alpha subunit  
1713 aspartate kinase, monofunctional class  
1788 UvrD/REP helicase N-terminal domain protein

1791 ABC transporter, substrate-binding protein, family 5  
1792 dipeptide transport system permease protein dppB  
1793 ABC transporter, permease protein  
1814 conserved hypothetical protein  
1818 conserved hypothetical protein  
1846 septum formation protein Maf  
1847 putative rRNA large subunit m3Psi methyltransferase RImH  
1848 iojap-like ribosome-associated protein  
1849 nicotinate-nucleotide adenyltransferase  
1850 coproporphyrinogen III oxidase, aerobic  
1851 phosphoribosylamine--glycine ligase  
1852 DNA-binding regulatory protein, YebC/PmpR family  
1854 aminotransferase, class III  
1871 Integral membrane protein domain protein  
1873 quinone oxidoreductase  
1876 PROBABLE THIOSULFATE SULFURTRANSFERASE PROTEIN  
1887 ring hydroxylating alpha subunit, catalytic domain protein  
1892 geranyltranstransferase PA4043  
1894 putative GTP cyclohydrolase  
1895 30s ribosomal protein s6.  
1896 primosomal replication protein N  
1897 ribosomal protein S18 (rpsR)  
1898 ribosomal protein L9  
1900 replicative DNA helicase  
1902 4-hydroxythreonine-4-phosphate dehydrogenase  
1903 PhoH family protein  
1904 bacterioferritin comigratory protein (AHPC/TSA family)  
1905 membrane protein  
1906 aminotransferase  
1907 homoserine dehydrogenase  
1908 threonine synthase  
1910 fructose-bisphosphatase  
1911 aminopeptidase N PA3083  
1919 glycolate oxidase subunit GlcD  
1920 glycolate oxidase subunits GlcE and GlcF  
1931 tRNA (5-methylaminomethyl-2-thiouridylate)-methyltransferase  
1932 sulfite exporter TauE/SafE  
1933 glutathione S-transferase  
1934 adenylosuccinate lyase  
1935 cytochrome C'  
1936 prokaryotic cytochrome b561  
1938 Domain of unknown function, putative  
1955 homocysteine synthase PA5025  
1957 dna-binding protein hu-beta  
1958 TonB protein, C-terminal domain protein  
1961 regulatory protein homolog  
1962 GHKL domain protein  
1963 putative potassium uptake protein  
1964 argininosuccinate synthase  
1965 ornithine carbamoyltransferase  
1969 4-phosphoerythronate dehydrogenase  
1977 ribosomal protein S20

1980 KR domain protein  
1981 adenylate kinase  
1982 3-deoxy-D-manno-octulosonate cytidyltransferase  
1983 Protein of unknown function (DUF343) superfamily  
1985 transporter, MotA/TolQ/ExbB proton channel family protein  
1989 beta-ketoadipyl coa thiolase  
1990 conserved hypothetical protein  
1992 ATP-dependent Clp protease adaptor protein ClpS  
1994 bifunctional penicillin binding protein 1C precursor  
1995 ATP-dependent clp protease ATP-binding  
1997 hypothetical protein  
2124 transcriptional regulator, LuxR family domain protein  
2125 threonyl-tRNA synthetase  
2126 translation initiation factor IF-3  
2127 glutathione synthase  
2128 PTS system, IIA component  
2129 phosphocarrier protein HPr  
2130 phosphoenolpyruvate-protein phosphotransferase  
2132 ornithine cyclodeaminase  
2133 Receptor family ligand binding region superfamily  
2144 signal peptidase II  
2145 isoleucyl-tRNA synthetase  
2147 phosphoribosylglycinamide formyltransferase  
2150 Fatty acid desaturase domain protein  
2151 putative DNA helicase II  
2154 hypothetical adenine-specific methylase nma1912  
2155 succinyl-diaminopimelate desuccinylase  
2247 lysine--tRNA ligase  
2251 single-stranded-DNA-specific exonuclease RecJ  
2252 lipoprotein, releasing system, transmembrane protein, LolC/E family  
2253 lipoprotein releasing system atp-binding protein lold.  
2456 argininosuccinate lyase  
2458 NAD<sup>+</sup> synthetase  
2474 Chorismate lyase superfamily  
2475 pseudouridylate synthase  
2480 protein  
2482 peptidase family M3  
2484 fold bifunctional protein [includes: methylenetetrahydrofolatedehydrogenase  
2485 transcriptional regulatory protein fixj.  
2486 tw-component sensor kinase  
2487 pyruvate dehydrogenase (acetyl-transferring), homodimeric type  
2490 major flagellin precursor  
2491 rna polymerase sigma factor for flagellar operon  
2494 chemotaxis protein MotA  
2527 flagellar biosynthetic protein FliQ  
2528 flagellar biosynthetic protein FliP  
2529 flagellar biosynthetic protein flip.  
2532 flagellar flil protein.  
2543 FliT , putative  
2544 flagellar protein FliS  
2545 Flagellar hook-associated protein 2  
2547 bifunctional protein FolC



2548 HYPOTHETICAL TRANSMEMBRANE PROTEIN  
2549 CvpA family protein  
2550 amidophosphoribosyltransferase  
2553 protein-P-II uridylyltransferase  
2554 methionine aminopeptidase, type I  
2555 ribosomal protein S2  
2556 translation elongation factor Ts  
2557 UMP kinase  
2558 ribosome recycling factor  
2559 undecaprenyl diphosphate synthase VC2256  
2561 1-deoxy-D-xylulose 5-phosphate reductoisomerase  
2563 outer membrane protein assembly complex, YaeT protein  
2564 Outer membrane protein (OmpH-like) superfamily  
2565 UDP-3-O-[3-hydroxymyristoyl] glucosamine N-acyltransferase  
2566 beta-hydroxyacyl-(acyl-carrier-protein) dehydratase FabZ  
2567 acyl-[acyl-carrier-protein]-UDP-N-acetylglucosamine O-acyltransferase  
2568 lipid-A-disaccharide synthase  
2569 ribonuclease HII  
2570 PUTATIVE TRNA/RRNA METHYLTRANSFERASE PROTEIN  
2571 kinase/pyrophosphorylase  
2572 pyruvate, water dikinase  
2578 Aromatic-Rich Protein Family superfamily  
2579 protein yjff  
2581 enoyl-CoA hydratase/isomerase family protein  
2584 Integral membrane protein superfamily  
2585 glycine cleavage T-protein  
2587 dTMP kinase  
2588 DNA polymerase III, delta' subunit  
2822 DoxD-like family superfamily  
2827 conserved hypothetical protein  
2830 glutathione peroxidase  
2835 lipoprotein, putative  
2838 D-methionine-binding lipoprotein MetQ  
2847 ABC transporter, ATP-binding protein  
2848 high-affinity branched-chain amino acid transport, ATP-binding protein  
2849 branched-chain amino acid ABC transporter, permease protein  
2850 high-affinity branched-chain amino acid ABC transporter, permease protein LivH  
2851 leucine-, isoleucine-, valine-, threonine-, and alanine-bindingprotein precursor  
2854 ABC transporter, solute-binding protein  
2857 sn-glycerol-3-phosphate transport atp-binding protein ugpc.  
2858 leucine-, isoleucine-, valine-, threonine-, and alanine-bindingprotein precursor  
2884 reactive intermediate/imine deaminase  
2889 ferredoxin--nadp reductase  
2891 ABC transporter, permease protein  
2894 pirin family protein  
2896 nitrogen regulation protein NR(I)  
2898 glutamine synthetase, type I  
2899 oxygen-independent coproporphyrinogen III oxidase, putative  
2900 non-canonical purine NTP pyrophosphatase RdgB  
2911 NlpC/P60 family protein  
2915 guanylate kinase  
2916 DNA-directed RNA polymerase, omega subunit

2917 gtp pyrophosphokinase  
2953 GDSL-like protein  
2954 PPIC-type PPIASE domain protein  
2956 protein hi0441  
2958 glutaredoxin domain protein  
2959 heavy metal-associated domain protein  
2960 Cu(I)-responsive transcriptional regulator  
2963 putative exported protein  
2964 conserved hypothetical protein  
2968 acyl-phosphate glycerol 3-phosphate acyltransferase  
2970 Xanthine/uracil permeases family subfamily  
2972 thioredoxin 2  
2974 ABC transporter, permease protein  
2976 ABC transporter, ATP-binding protein  
2977 putative ABC transporter, ATP-binding protein YbiT  
2984 muramoyltetrapeptide carboxypeptidase  
2985 cytidine and deoxycytidylate deaminase family protein  
2986 conserved hypothetical protein  
2988 potassium efflux system protein phag  
2989 pH adaptation potassium efflux system protein F  
2990 putative pH adaptation potassium efflux protein  
2993 putative lipoprotein  
3000 hypothetical protein  
3039 transcriptional regulator  
3040 nitric oxide dioxygenase  
3041 uncharacterized conserved protein, YqeY  
3042 dna polymerase iv  
3043 conserved domain protein  
3045 peptidase  
3046 penicillin-binding protein, 1A family  
3108 RNA polymerase sigma factor RpoD  
3110 ribosomal protein S21  
3111 Phosphoribosyl transferase domain, putative  
3112 adenylosuccinate synthase  
3113 atp phosphoribosyltransferase regulatory subunit.  
3114 HflC-like protein  
3115 HflK protein  
3116 GTP-binding protein HflX  
3117 hfq protein  
3118 histidinol-phosphate transaminase  
3119 ribosome-associated GTPase EngA  
3120 outer membrane assembly lipoprotein YfgL  
3121 conserved hypothetical protein  
3122 histidine--tRNA ligase  
3123 4-hydroxy-3-methylbut-2-en-1-yl diphosphate synthase  
3124 DNA-binding helix-turn-helix protein  
3125 23S rRNA m2A2503 methyltransferase  
3126 nucleoside diphosphate kinase  
3133 tRNA (guanine-N1)-methyltransferase  
3134 putative 16S rRNA processing protein RimM  
3159 FAD dependent oxidoreductase  
3160 putative CDP-6-deoxy-L-threo-D-glycero-4-hexulose-3-dehydrase reductase

3162 MOSC N-terminal beta barrel domain protein  
3169 diaminobutyrate acetyltransferase  
3177 DNA topoisomerase IV, A subunit  
3179 DNA gyrase, B subunit, C-terminal domain protein  
3181 thioredoxin  
3182 transcription termination factor Rho  
3184 conserved hypothetical protein  
3187 carboxymethylenebutenolidase family superfamily  
3188 metal cation transporter, ZIP domain protein  
3194 ribosome-binding factor A  
3197 conserved hypothetical protein  
3199 segregation and condensation protein B  
3204 maleylacetoacetate isomerase  
3205 4-hydroxy-3-methylbut-2-enyl diphosphate reductase  
3206 peptidyl-prolyl cis-trans isomerase, FKBP-type  
3207 dna repair protein radc homolog.  
3208 arylformamidase  
3209 tryptophan 2,3-dioxygenase  
3210 ribosomal protein L31  
3212 MATE efflux family protein  
3214 DNA repair protein RadA  
3219 alanine racemase  
3244 NUDIX domain protein  
3288 queuine synthase  
3291 CDP-diacylglycerol--glycerol-3-phosphate 3-phosphatidyltransferase  
3292 excinuclease ABC, C subunit  
3293 beta-hexosaminidase  
3294 holo-[acyl-carrier-protein] synthase  
3295 pyridoxal phosphate biosynthetic protein PdxJ  
3297 multiple transferable resistance system protein MtrD  
3301 putative lipoprotein  
3303 sulfate/thiosulfate import atp-binding protein cysa  
3304 ABC transporter integral membrane protein  
3305 Protein of unknown function (DUF534) superfamily  
3313 acetyl-CoA C-acyltransferase  
3315 glycine betaine transport atp-binding protein opuaa  
3316 inner membrane protein (AF111939)  
3317 ABC transporter, quaternary amine uptake transporter family, substrate-binding protein  
3319 drug resistance transporter, Bcr/CflA family  
3321 ribosomal protein L33  
3326 leucine--tRNA ligase  
3327 LPS export system outer membrane protein LptE  
3328 DNA polymerase III, delta subunit  
3329 glutamate-5-semialdehyde dehydrogenase  
3360 dna-3-methyladenine glycosylase  
3361 ArsC family subfamily  
3362 putrescine transport system permease protein poti.  
3363 putrescine transport system permease protein poth.  
3364 polyamine ABC transporter, ATP-binding protein  
3365 ABC transporter, solute-binding protein  
3366 lipopolysaccharide kinase, Kdo/WaaP family  
3368 permease, putative domain protein

3370 Tripartite ATP-independent periplasmic transporters, DctQ component family  
3376 phenylacetic acid degradation protein paai  
3377 probable enoyl-coa hydratase paag  
3378 phenylacetic acid degradation protein paaN  
3380 phenylacetic acid degradation protein paac  
3381 phenylacetic acid degradation protein paab  
3383 phenylacetic acid degradation operon negative regulatory protein paax  
3386 oligoribonuclease  
3387 peptidase, M48 family  
3388 GTPase YjeQ  
3391 ribosomal protein L19  
3402 AhpC/TSA family protein  
3403 Acyl-CoA dehydrogenase, C-terminal domain protein  
3406 histone deacetylase family protein  
3407 membrane-bound lytic murein transglycosylase b precursor  
3410 ADP-L-glycero-D-manno-heptose-6-epimerase  
3411 bifunctional protein RfaE, domain I  
3412 PUTATIVE TRANSMEMBRANE PROTEIN  
3413 conserved hypothetical protein  
3414 integration host factor beta-subunit  
3415 ribosomal protein S1  
3416 cytidylate kinase  
3417 3-phosphoshikimate 1-carboxyvinyltransferase  
3419 chorismate mutase/prephenate dehydratase NMB0446  
3420 phosphoserine aminotransferase  
3421 DNA gyrase, A subunit  
3422 outer membrane protein A  
3423 3-demethylubiquinone-9 3-O-methyltransferase  
3424 phosphoglycolate phosphatase  
3502 lytic murein transglycosylase  
3503 PF04305 family protein  
3505 PF08909 domain protein  
3509 CsbD-like family  
3511 osmotically inducible protein Y  
3513 4Fe-4S binding domain protein  
3515 iron permease FTR1 family protein  
3516 cupredoxin-like domain protein  
3517 Fe<sup>2+</sup> transport protein  
3518 phbF protein (AF026544)  
3519 acetoacetyl-coa reductase  
3520 poly-beta-hydroxybutyrate polymerase  
3523 outer membrane assembly lipoprotein YfiO  
3524 probable enzyme Z2851  
3578 dihydrolipoyl dehydrogenase  
3580 2-oxoglutarate dehydrogenase, E1 component  
3583 pyruvate dehydrogenase e1 component  
3587 citrate synthase I  
3589 succinate dehydrogenase (EC 1.3.99.1)  
3591 succinate dehydrogenase, hydrophobic membrane anchor protein  
3592 succinate dehydrogenase, cytochrome b556 chain  
3593 UbiC transcription regulator-associated domain protein  
3594 malate dehydrogenase

3600 Uncharacterised protein family (UPF0093) superfamily  
3602 hypothetical protein  
3606 transferase hexapeptide repeat protein  
3607 chaperonin HslO  
3613 cell division protein ftsb homolog  
3617 CTP synthase  
3618 metallopeptidase family M24  
3620 peptidase family T4  
3621 dipeptide transport system permease protein dppc  
3622 dipeptide transport system permease protein  
3625 L-asparaginase  
3626 SIS domain protein  
3629 thioesterase family protein  
3630 electron-transferring-flavoprotein dehydrogenase  
3631 NAD(P)H-binding protein, PF13460 family  
3640 NlpC/P60 family protein  
3642 transcription regulator CysB PA1754  
3644 ABC transporter substrate-binding protein  
3646 LPS export ABC transporter permease LptF  
3647 cytosol aminopeptidase family, catalytic domain protein  
3648 DNA polymerase III, chi subunit  
3650 Uncharacterized protein family UPF0005, putative  
3655 DNA repair protein RecO  
3656 GTP-binding protein Era  
3657 ribonuclease iii  
3659 GTP-binding protein LepA  
3660 putative serine protease MucD  
3661 PUTATIVE SIGMA-E FACTOR REGULATORY (NEGATIVE REGULATOR) PROTEIN  
3662 Anti sigma-E protein RseA, N-terminal domain family  
3663 rpoE protein homolog  
3665 beta-ketoacyl synthase  
3666 acyl carrier protein  
3667 3-oxoacyl-(acyl-carrier-protein) reductase  
3668 [acyl-carrier-protein] S-malonyltransferase  
3669 beta-ketoacyl-acyl-carrier-protein synthase III  
3670 fatty acid/phospholipid synthesis protein PlsX  
3671 ribosomal protein L32  
3672 hypothetical protein  
3673 maf protein  
3674 Tetrapyrrole (Corrin/Porphyrin) Methylases, putative  
3675 putative exported hydrolase  
3676 ferric reductase-like transmembrane component  
3679 ribosomal large chain pseudouridine synthase C  
3685 tryptophan synthase, alpha subunit  
3686 tryptophan synthase, beta subunit  
3690 flavin reductase domain protein  
3692 nicotinate phosphoribosyltransferase  
3695 intracellular poly[D(-)-3-hydroxybutyrate] depolymerase  
3697 endonuclease III  
3700 Receptor family ligand binding region superfamily  
3707 Branched-chain amino acid transport system / permease component superfamily  
3708 Receptor family ligand binding region superfamily

3712 PilB-related protein  
3713 intracellular septation protein A  
3714 PPIC-type PPIASE domain protein  
3717 chromosome segregation protein SMC  
3718 transporter, major facilitator family protein  
3720 tRNA threonylcarbamoyl adenosine modification protein YeaZ  
3723 alkyl hydroperoxide reductase  
3739 conserved hypothetical protein  
3741 NADH dehydrogenase I, N chain NMB0259  
3742 proton-translocating NADH-quinone oxidoreductase, chain M  
3743 nadh-quinone oxidoreductase chain I  
3744 NADH dehydrogenase I, J chain NMB0253  
3745 NADH2 dehydrogenase (ubiquinone) (EC 1.6.5.3) I chain I  
3747 NADH dehydrogenase  
3749 NADH-quinone oxidoreductase, F subunit  
3750 NADH dehydrogenase I, E chain NMB0245  
3751 NADH dehydrogenase I, D subunit  
3752 respiratory-chain NADH dehydrogenase, 30 kDa subunit  
3754 NADH2 dehydrogenase (ubiquinone) (EC 1.6.5.3) I chain A  
3755 outer membrane porin protein bp0840 precursor  
3757 HYPOTHETICAL TRANSMEMBRANE PROTEIN  
3759 PAP2 homolog protein  
3760 calcineurin-like phosphoesterase family protein  
3792 hypothetical protein  
3793 threonine ammonia-lyase  
3795 polyribonucleotide nucleotidyltransferase  
3796 ribosomal protein S15  
3797 lipoprotein, putative  
3798 phosphatidylserine synthase PA4693  
3799 ketol-acid reductoisomerase  
3800 acetolactate synthase, small subunit  
3801 acetolactate synthase, large subunit, biosynthetic type  
3806 d-beta-hydroxybutyrate dehydrogenase  
3819 hypothetical protein  
3822 seryl-tRNA synthetase  
3823 MgsA AAA+ ATPase family protein  
3825 dna translocase ftsk  
3826 thioredoxin-disulfide reductase  
3837 isocitrate dehydrogenase, NADP-dependent  
3838 conserved hypothetical protein  
3841 ATPase, AAA family  
3842 hypothetical protein  
3846 chaperone protein dnaj  
3847 chaperone protein DnaK  
3849 hypothetical protein  
3850 co-chaperone GrpE  
3851 conserved hypothetical protein  
3852 ferrochelatase  
3853 heat-inducible transcription repressor HrcA  
3858 dihydrodipicolinate reductase  
3884 PF11161 family protein  
3887 NUDIX domain protein

3890 dihydroorotate dehydrogenase (fumarate)  
3892 Uncharacterized protein family, UPF0065 superfamily  
3894 transcriptional regulator, lclR family family  
3895 Probable molybdopterin binding domain protein  
3896 hypothetical protein  
3897 thioredoxin domain protein  
3898 DEAD/DEAH box helicase  
3899 AzIC protein  
3902 conserved hypothetical protein  
3903 Esterase/lipase/thioesterase family active site  
3904 peptidase, M48 family  
3905 UTP-glucose-1-phosphate uridylyltransferase  
3910 aminopeptidase P PA5224  
3913 TIM-barrel protein, nifR3 family  
3916 crossover junction endodeoxyribonuclease RuvC  
3921 ATP-dependent DNA helicase RecQ  
3923 transcription regulatory protein ompR  
3924 ATPase, histidine kinase-, DNA gyrase B-, and HSP90-like domain protein protein  
3927 glutaminyl-tRNA synthetase  
3931 osmotically inducible lipoprotein B precursor  
3932 isochorismatase family protein superfamily  
3946 conserved hypothetical protein  
3950 PUTATIVE PARA-AMINOBENZOATE SYNTHETASE COMPONENT I PROTEIN  
3958 pyridoxamine 5'-phosphate oxidase  
3959 flavin reductase-like protein  
3960 FAD dependent oxidoreductase  
3961 formyltetrahydrofolate deformylase  
3968 tripartite tricarboxylate transporter family receptor  
3970 fumarate hydratase, class II  
3972 N-acetylmuramoyl-L-alanine amidase  
3975 tRNA delta(2)-isopentenylpyrophosphate transferase  
3976 phosphoribosylformylglycinamide cyclo-ligase  
3977 DnaA regulatory inactivator Hda  
3978 poly(A) polymerase  
3979 2-amino-4-hydroxy-6-hydroxymethyldihydropteridine diphosphokinase  
4004 glycine--tRNA ligase, alpha subunit  
4005 glycine--tRNA ligase, beta subunit  
4006 haloacid dehalogenase-like hydrolase, putative  
4007 probable acyltransferase PA0005  
4009 lactoylglutathione lyase  
4010 polypeptide deformylase  
4013 transporter gate domain protein  
4015 glycerate kinase  
4016 dimethyladenosine transferase  
4019 phosphotransferase enzyme family protein  
4020 MobA-like NTP transferase domain protein  
4021 putative inner membrane protein  
4080 ABC transporter substrate binding protein  
4081 d-methionine transport system permease protein meti  
4082 d-methionine transport atp-binding protein metn  
4083 glycoside hydrolase, family 31  
4088 putative hydrolase

4090 putative membrane protein  
4096 transcription regulatory protein, asnc family  
4101 conserved hypothetical protein  
4102 preprotein translocase, SecA subunit  
4103 peptidase, M23 family  
4104 flagellar hook-length control protein FliK  
4105 UDP-3-O-[3-hydroxymyristoyl] N-acetylglucosamine deacetylase  
4106 cell division protein FtsZ  
4107 cell division protein FtsA  
4108 cell division protein FtsQ  
4109 D-alanine--D-alanine ligase  
4110 UDP-N-acetylmuramate--alanine ligase  
4111 undecaprenyldiphospho-muramoylpentapeptide beta-N-acetylglucosaminyltransferase  
4112 cell division protein NMA2063  
4113 UDP-N-acetylmuramoyl-L-alanine--D-glutamate ligase  
4114 phospho-N-acetylmuramoyl-pentapeptide-transferase  
4115 UDP-N-acetylmuramoyl-L-alanyl-D-glutamate--2,6-diaminopimelate ligase  
4116 penicillin-binding protein, transpeptidase domain protein  
4117 cell division protein FtsL  
4118 S-adenosyl-methyltransferase MraW  
4119 protein MraZ  
4121 dihydroorotase, homodimeric type  
4122 hippurate hydrolase  
4123 swib (ym74) complex protein  
4125 winged helix-turn-helix DNA-binding protein  
4126 4-hydroxyphenylpyruvate dioxygenase  
4128 cytochrome c-552 precursor  
4130 prolipoprotein diacylglycerol transferase  
4138 LysR substrate-binding domain protein  
4143 MutT/nudix family protein VC0671  
4144 prolyl-tRNA synthetase  
4147 TolR protein XF1899  
4150 tolB protein precursor  
4151 peptidoglycan-associated lipoprotein  
4152 conserved hypothetical protein  
4174 universal stress protein family  
4175 conserved hypothetical protein TIGR01244  
4176 transcriptional regulator, gntR family domain protein  
4190 DNA polymerase III, epsilon subunit  
4193 ribonuclease HI  
4194 methyltransferase domain protein  
4195 hydroxyacylglutathione hydrolase XF2160  
4196 LysM domain protein  
4197 enoyl-[acyl-carrier-protein] reductase [nadh]  
4202 hypothetical protein  
4255 riboflavin biosynthesis protein RibD  
4258 transcriptional regulator, NrdR family  
4259 glycine hydroxymethyltransferase  
4260 conserved hypothetical protein TIGR00481  
4261 tyrosyl-tRNA synthetase  
4263 Uncharacterised protein family (UPF0075) superfamily  
4264 hesB family protein VC0627



4266 N-acetyl-gamma-glutamyl-phosphate reductase  
4267 ribosomal protein S9  
4268 ribosomal protein L13  
4271 TldD/PmbA family protein  
4272 PF04751 family protein  
4273 carboxylesterase XF1624  
4282 succinyl-CoA ligase-like flavodoxin domain protein  
4283 glutamate--tRNA ligase  
4288 ribonucleoside-diphosphate reductase, alpha subunit  
4289 ribonucleoside-diphosphate reductase beta chain  
4291 YGGT family domain protein  
4298 carbohydrate kinase, PfkB family  
4299 possible membrane protein  
4301 acetyl-CoA carboxylase, biotin carboxylase  
4308 TonB protein XF1957  
4311 LPS ABC transporter, permease protein LptG  
4312 bis(5'-nucleosyl)-tetrphosphatase (symmetrical)  
4313 acyltransferase  
4316 RNase H domain protein, YqgF family  
4319 thiamine-phosphate diphosphorylase  
4320 glutamate-1-semialdehyde-2,1-aminomutase  
4322 transcription regulator aldR  
4323 conserved hypothetical protein  
4324 AMP-binding enzyme domain protein  
4325 acyl-coa dehydrogenase, short-chain specific, mitochondrial  
4326 enoyl-CoA hydratase/isomerase family protein  
4329 high-affinity branched-chain amino acid transport atp-binding proteinlivf  
4335 probable transcription regulator, putative  
4337 arginine biosynthesis bifunctional protein ArgJ  
4339 putative thiamine-phosphate diphosphorylase  
4340 efflux transporter, outer membrane factor lipoprotein, NodT family  
4343 efflux transporter, RND family, MFP subunit  
4344 PF07072 family protein  
4345 dephospho-CoA kinase  
4346 type IV prepilin leader peptidase  
4347 conserved hypothetical protein  
4348 pantoate--beta-alanine ligase  
4349 segregation and condensation protein A  
4350 PF11943 family protein  
4351 drug resistance MFS transporter, drug:H+ antiporter-2 family  
4352 glycerol kinase  
4354 Uncharacterized protein family, UPF0065 superfamily  
4355 conserved hypothetical protein  
4356 amino acid ABC transporter, permease protein  
4357 amino acid ABC transporter, permease protein  
4358 general L-amino acid-binding periplasmic protein AapJ  
4360 cell division protein FtsX homolog  
4361 chemotaxis protein CheD  
4363 A/G-specific adenine glycosylase  
4366 methionine synthase  
4369 thiazole biosynthesis protein ThiG  
4370 putative phosphomethylpyrimidine kinase

4371 protein-l-isoaspartate o-methyltransferase  
4374 aut protein  
4379 ubiquinone/menaquinone biosynthesis methyltransferase UbiE  
4380 phosphate regulon transcriptional regulatory protein PhoB  
4381 phosphate regulon sensor kinase PhoR  
4385 phosphoglycerate dehydrogenase  
4387 glyoxalase family protein superfamily  
4388 sensor histidine kinase inhibitor, Kipl family  
4389 allophanate hydrolase subunit 2  
4390 lactam utilization protein ycsF  
4398 PF12447 family protein  
4400 threonine dehydratase, biosynthetic  
4404 adenine phosphoribosyltransferase  
4406 thiol reductant ABC exporter, CydD subunit  
4407 putative exported protein  
4408 cytochrome d ubiquinol oxidase, subunit II  
4409 cytochrome d oxidase chain (AF284438) AGR\_L\_1529  
4411 phosphoribosylglycinamide formyltransferase 2  
4412 polysialic acid capsule expression protein XF1413  
4413 3-deoxy-d-manno-octulosonate 8-phosphate phosphatase  
4414 lipopolysaccharide transport periplasmic protein LptA  
4415 LPS export ABC transporter ATP-binding protein  
4416 putative PTS IIA-like nitrogen-regulatory protein PtsN  
4420 Uncharacterised P-loop ATPase protein family (UPF0042) superfamily  
4421 lipoprotein A-like protein  
4426 HYPOTHETICAL SIGNAL PEPTIDE PROTEIN  
4427 redoxin  
4428 outer membrane protein XF0873  
4429 acetylglutamate kinase  
4430 hydrolase, probable NMB0040  
4431 transcriptional regulator, TetR family  
4435 rod shape-determining protein roda  
4436 penicillin-binding protein 2  
4437 conserved hypothetical protein  
4438 rod shape-determining protein MreC  
4439 regulator of ftsI  
4441 aspartyl/glutamyl-tRNA(Asn/Gln) amidotransferase, A subunit  
4462 muropeptide transporter  
4495 transcriptional regulatory protein  
4496 nitronate monooxygenase  
4498 enoyl-CoA hydratase/isomerase family protein family  
4499 YjeF family C-terminal domain protein  
4500 hypothetical protein  
4507 hypothetical protein  
4511 uroporphyrinogen decarboxylase  
4512 transcriptional regulator, Fis domain protein  
4513 ATP synthase F1, epsilon subunit  
4514 ATP synthase F1, beta subunit  
4515 ATP synthase F1, gamma subunit  
4516 ATP synthase F1, alpha subunit  
4517 ATP synthase F1, delta subunit  
4518 ATP synthase F0, B subunit

4520 ATP synthase F0, A subunit  
4522 enoyl-CoA hydratase/isomerase family protein  
4523 peptidase, M61 glycyL aminopeptidase family protein  
4524 pyridine nucleotide-disulfide oxidoreductase  
4526 ATPases of the PP superfamily BMEI1132  
4528 conserved hypothetical protein  
4529 protein visc  
4530 MltA family family  
4531 apaG protein  
4533 phosphoglycolate phosphatase  
4534 anthranilate synthase component I  
4726 glycosyltransferase, group 1 family protein  
4727 nucleotide sugar dehydrogenase  
4728 putative membrane protein  
4729 UDP-N-acetylglucosamine diphosphorylase/glucosamine-1-phosphate N-acetyltransferase  
4731 PF12512 family protein  
4732 SCO1/2 family protein  
4733 protoheme IX farnesyltransferase  
4734 cytochrome oxidase assembly protein  
4742 NUDIX domain protein  
4744 calcineurin-like phosphoesterase family protein  
4745 transcription initiation factor sigma 32  
4746 hypothetical protein  
4747 S-formylglutathione hydrolase  
4749 hypothetical protein  
4750 glutamate synthase (NADH2) (EC 1.4.1.14) large chain  
4751 pyridine nucleotide-disulfide oxidoreductase  
4755 toluene tolerance protein XF0420  
4756 outer membrane lipid asymmetry maintenance protein MlaD  
4757 lipid asymmetry maintenance protein MlaA  
4758 Toluene tolerance, Ttg2 superfamily  
4761 BofA/YrbA family protein NMB0009  
4762 UDP-N-acetylglucosamine 1-carboxyvinyltransferase  
4763 ATP phosphoribosyltransferase  
4764 histidinol dehydrogenase  
4766 imidazoleglycerol-phosphate dehydratase  
4767 imidazole glycerol phosphate synthase, glutamine amidotransferase subunit-like protein  
4768 1-(5-phosphoribosyl)-5-[(5-phosphoribosylamino)methylideneamino]imidazole-4-carboxamide isomerase  
4769 imidazoleglycerol phosphate synthase, cyclase subunit  
4770 phosphoribosyl-ATP diphosphatase  
4771 HIT family hydrolase  
4772 sec-independent protein translocase protein tata/e homolog  
4774 Sec-independent protein translocase TatC  
4777 conserved hypothetical protein TIGR00486  
4778 large conductance mechanosensitive channel protein  
4779 ubiquinol-cytochrome c reductase, iron-sulfur subunit  
4780 cytochrome B/b6/PetD  
4781 cytochrome c1 family protein  
4782 stringent starvation protein A  
4783 stringent starvation protein B XF0912  
4815 conserved hypothetical protein  
4822 DEAD/DEAH box helicase

4823 homoserine/homoserine lactone efflux protein  
4824 peptide chain release factor 3  
4825 hypothetical protein  
4845 hypothetical protein  
4846 hypothetical protein  
4847 arginine--tRNA ligase  
4848 sporulation and cell division repeat protein  
4849 thiol:disulfide interchange protein dsba precursor  
4850 cystathionine beta-lyase  
4852 metallo-beta-lactamase superfamily domain protein  
4856 Probable thiolase  
4857 carboxyl transferase domain protein  
4860 transaminase, acetylornithine/succinylornithine family  
4862 alanine racemase, N-terminal domain protein  
4866 PF04361 family protein  
4874 putative gluconate 5-dehydrogenase  
4875 PROBABLE ALDEHYDE DEHYDROGENASE OXIDOREDUCTASE PROTEIN  
4897 DNA gyrase, B subunit  
4900 chromosomal replication initiator protein DnaA  
4901 ribosomal protein L34

## Supplementary References

- s1. Parkhill J, Sebahia M, Preston A, Murphy LD, Thomson N, Harris DE, Holden MT, Churcher CM, Bentley SD, Mungall KL, Cerdeno-Tarraga AM, Temple L, James K, Harris B, Quail MA, Achtman M, Atkin R, Baker S, Basham D, Bason N, Cherevach I, Chillingworth T, Collins M, Cronin A, Davis P, Doggett J, Feltwell T, Goble A, Hamlin N, Hauser H, Holroyd S, Jagels K, Leather S, Moule S, Norberczak H, O'Neil S, Ormond D, Price C, Rabinowitsch E, Rutter S, Sanders M, Saunders D, Seeger K, Sharp S, Simmonds M, Skelton J, Squares R, Squares S, Stevens K, Unwin L, Whitehead S, Barrell BG, Maskell DJ (2003) Comparative analysis of the genome sequences of *Bordetella pertussis*, *Bordetella parapertussis* and *Bordetella bronchiseptica*. *Nat Genet* 35: 32-40.
- s2. Register KB, Ivanov YV, Jacobs N, Meyer JA, Goodfield LL, Muse SJ, Smallridge WE, Brinkac L, Kim M, Sanka R, Harvill ET, Losada L (2015) Draft Genome Sequences of 53 Genetically Distinct Isolates of *Bordetella bronchiseptica* Representing 11 Terrestrial and Aquatic Hosts. *Genome Announc* 3: e00152-15.
- s3. Nicholson TL, Shore SM, Bayles DO, Register KB, Kingsley RA (2014) Draft Genome Sequence of the *Bordetella bronchiseptica* Swine Isolate KM22. *Genome Announc* 2: e00670-14.
- s4. Park J, Zhang Y, Buboltz AM, Zhang X, Schuster SC, Ahuja U, Liu M, Miller JF, Sebahia M, Bentley SD, Parkhill J, Harvill ET (2012) Comparative genomics of the classical *Bordetella* subspecies: the evolution and exchange of virulence-associated diversity amongst closely related pathogens. *BMC Genomics* 13: 545.
- s5. Register KB, Ivanov YV, Harvill ET, Davison N, Foster G (2015) Novel, host-restricted genotypes of *Bordetella bronchiseptica* associated with phocine respiratory tract isolates. *Microbiology* 161: 580-592.
- s6. Zhang S, Xu Y, Zhou Z, Wang S, Yang R, Wang J, Wang L (2011) Complete genome sequence of *Bordetella pertussis* CS, a Chinese pertussis vaccine strain. *J Bacteriol* 193: 4017-4018.
- s7. Harvill ET, Goodfield LL, Ivanov Y, Meyer JA, Newth C, Cassidy P, Tondella ML, Liao P, Zimmerman J, Meert K, Wessel D, Berger J, Dean JM, Holubkov R, Burr J, Liu T, Brinkac L, Kim M, Losada L (2013) Genome Sequences of 28 *Bordetella pertussis* U.S. Outbreak Strains Dating from 2010 to 2012. *Genome Announc* 1: e01075-13.
- s8. Harvill ET, Goodfield LL, Ivanov Y, Smallridge WE, Meyer JA, Cassidy PK, Tondella ML, Brinkac L, Sanka R, Kim M, Losada L (2014) Genome Sequences of Nine *Bordetella holmesii* Strains Isolated in the United States. *Genome Announc* 2: e00438-14.
- s9. Tatti KM, Loparev VN, Ranganathanakammal S, Changayil S, Frace M, Weil MR, Sammons S, Maccannell D, Mayer LW, Tondella ML (2013) Draft genome sequences of *Bordetella holmesii* strains from blood (F627) and nasopharynx (H558). *Genome Announc* 1: e00056-13.

- s10. Register KB, Ivanov YV, Harvill ET, Brinkac L, Kim M, Losada L (2015) Draft Genome Sequences of Six *Bordetella hinzii* Isolates Acquired from Avian and Mammalian Hosts. *Genome Announc* 3: e00081-15.
- s11. Shah NR, Moksa M, Novikov A, Perry MB, Hirst M, Caroff M, Fernandez RC (2013) Draft Genome Sequences of *Bordetella hinzii* and *Bordetella trematum*. *Genome Announc* 1: e00838-13.
- s12. Sebahia M, Preston A, Maskell DJ, Kuzmiak H, Connell TD, King ND, Orndorff PE, Miyamoto DM, Thomson NR, Harris D, Goble A, Lord A, Murphy L, Quail MA, Rutter S, Squares R, Squares S, Woodward J, Parkhill J, Temple LM (2006) Comparison of the genome sequence of the poultry pathogen *Bordetella avium* with those of *B. bronchiseptica*, *B. pertussis*, and *B. parapertussis* reveals extensive diversity in surface structures associated with host interaction. *J Bacteriol* 188: 6002-6015.
- s13. Gross R, Guzman CA, Sebahia M, dos Santos VA, Pieper DH, Koebnik R, Lechner M, Bartels D, Buhrmester J, Choudhuri JV, Ebensen T, Gaigalat L, Herrmann S, Khachane AN, Larisch C, Link S, Linke B, Meyer F, Mormann S, Nakunst D, Ruckert C, Schneiker-Bekel S, Schulze K, Vorholter FJ, Yevsa T, Engle JT, Goldman WE, Puhler A, Gobel UB, Goesmann A, Blocker H, Kaiser O, Martinez-Arias R (2008) The missing link: *Bordetella petrii* is endowed with both the metabolic versatility of environmental bacteria and virulence traits of pathogenic *Bordetellae*. *BMC Genomics* 9: 449.
